# Supplementary material
Source: PubMed Central journal article supplement (PMC535382)

# Bone Marrow

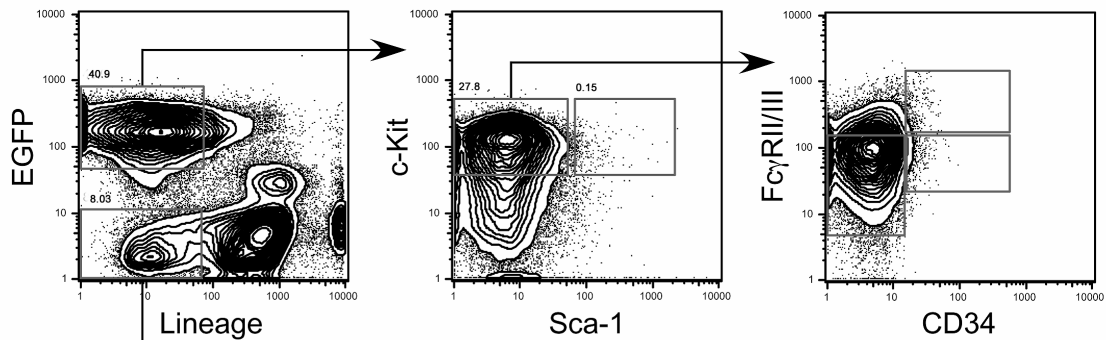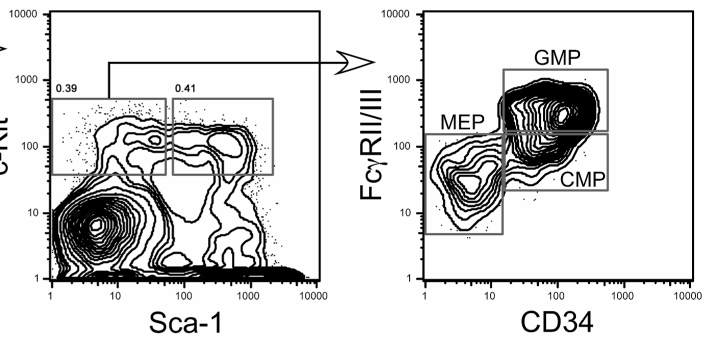

# Spleen

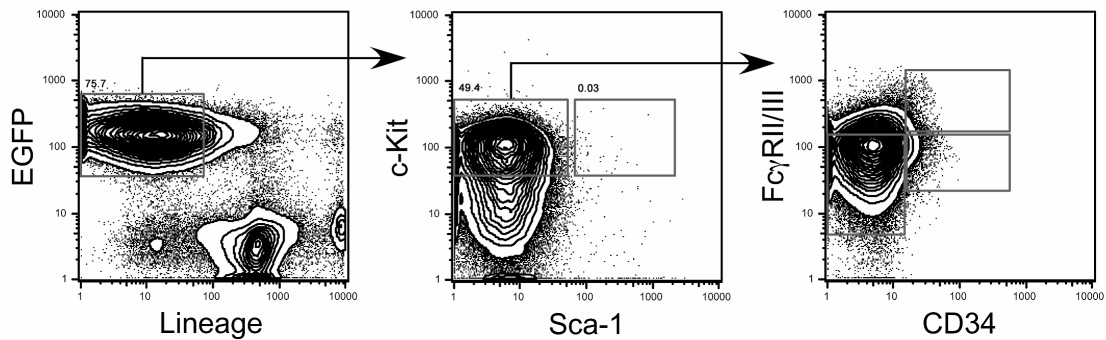

Supplement: pnas_101_49_17186__1.pdf [file pnas_101_49_17186__1.pdf]
